# Supplementary material for: Atomistic insights into the nucleation and growth of hexagonal boron nitride and graphene heterostructures
Source: Royal Society of Chemistry journal article supplement (doi:10.1039/d4cp03300k), 2024-01-01
Supplement: d4cp03300k1.pdf [file d4cp03300k1.pdf]

## Supplementary information for

### Atomistic insights into the nucleation and growth of hexagonal boron nitride and graphene heterostructures

Mohamed Achehboune\*<sup>a</sup>, Kazem Zhour<sup>b</sup>, Jaroslaw Dabrowski<sup>c</sup>, Dominique Vignaud<sup>d</sup>, Max Franck<sup>c</sup>, Mindaugas Lukosius<sup>c</sup>, Jean-François Colomer<sup>a</sup> and Luc Henrard<sup>a</sup>

<sup>a</sup>Laboratoire de Physique du solide, Namur Institute of Structured Matter, University of Namur, Rue de Bruxelles 61, 5000, Namur, Belgium. Email : [achehboune.mohamed01@gmail.com](mailto:achehboune.mohamed01@gmail.com)

<sup>b</sup>Institute of Physical Chemistry, University of Münster, Corrensstraße 28/30, 48149 Münster, Germany

<sup>c</sup>IHP – Leibniz-Institut für innovative Mikroelektronik, Im Technologiepark 25, 15236 Frankfurt (Oder), Germany

<sup>d</sup>Univ. Lille, CNRS, Univ Polytechnique Hauts-de-France, UMR 8520 Institut d'Electronique de Microélectronique et de Nanotechnologie (IEMN), F-59000 Lille, France

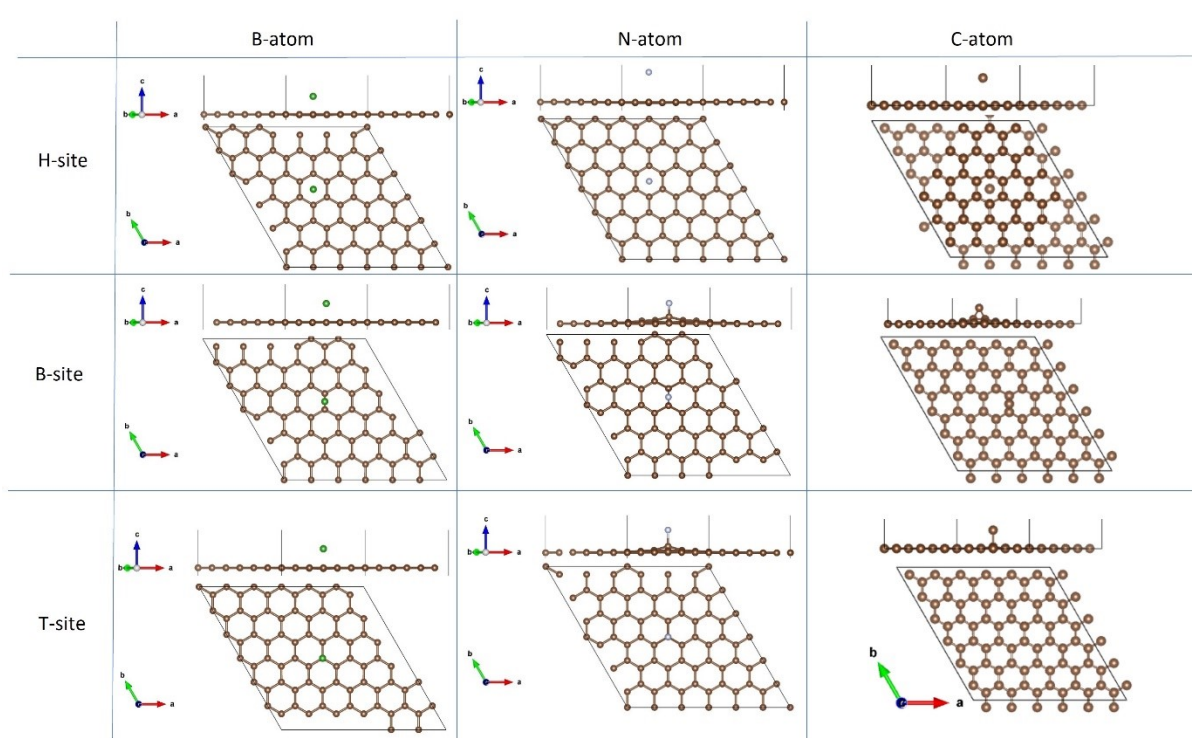

**Fig. S1.** The relaxed structures for adsorbed atoms B, N and C on hBN in different positions.



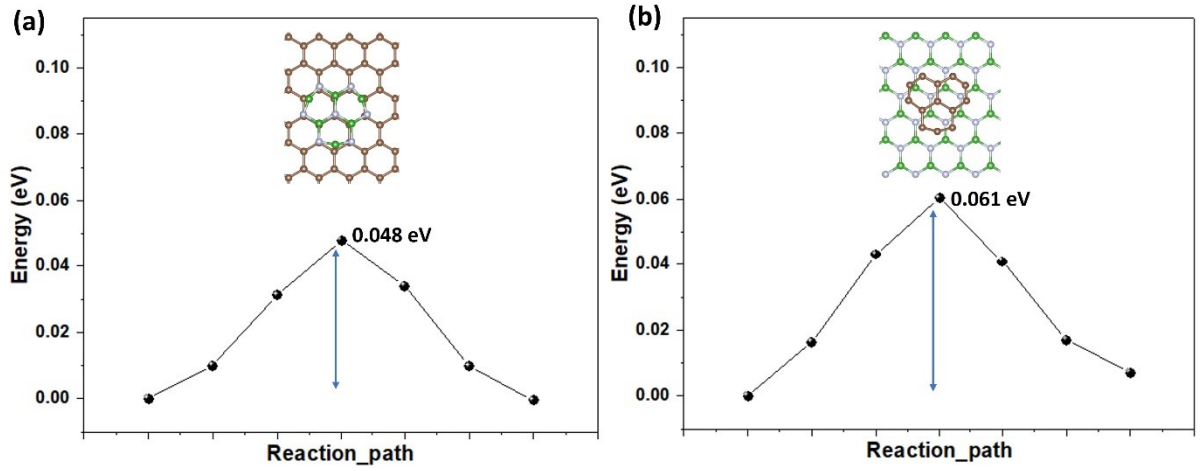

Fig. S4 Energy barriers for (a) BN clusters on graphene and (b) Carbon clusters on hBN.

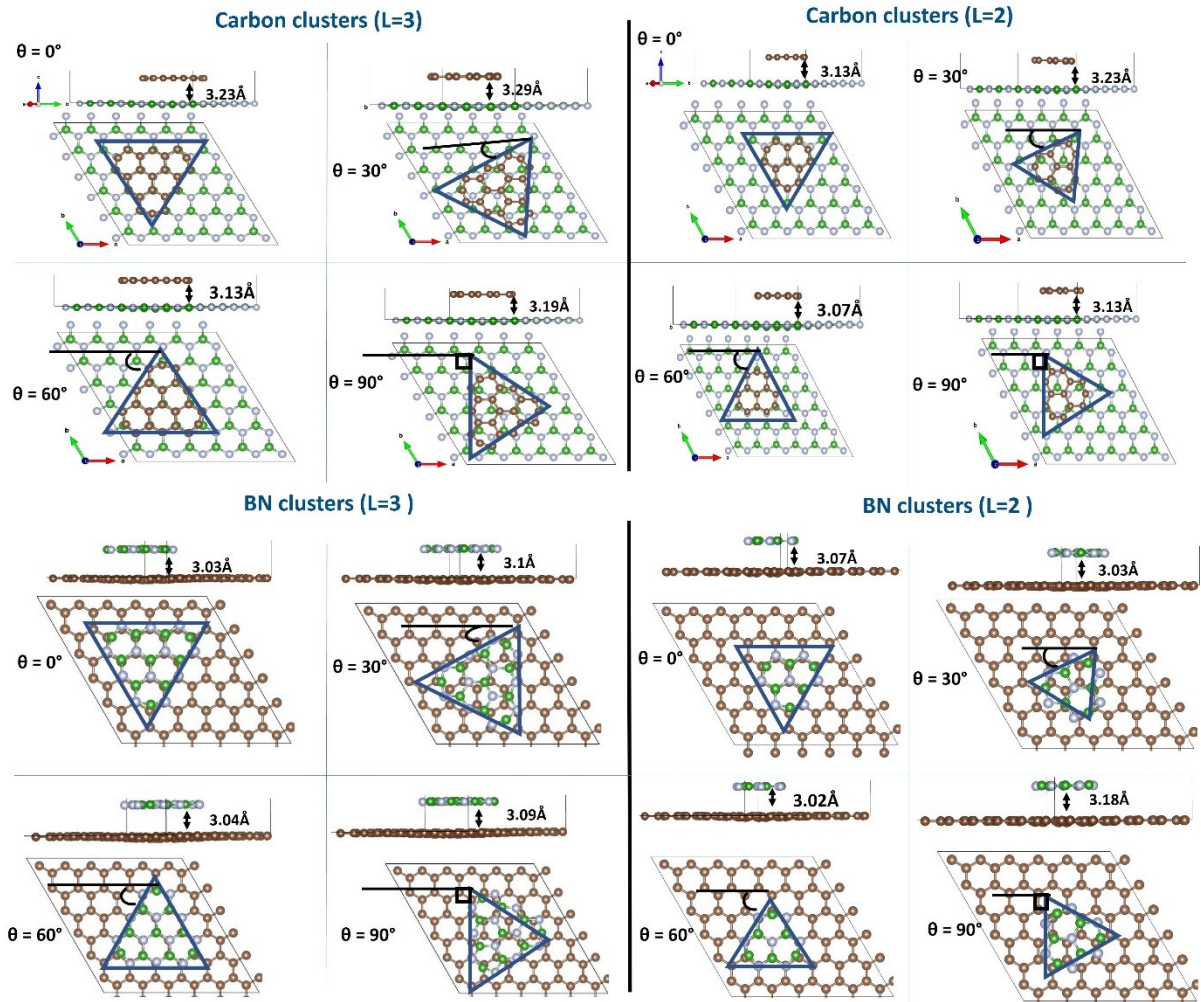

Fig. S5 the relaxed structures of carbon and hBN clusters on graphene and hBN surfaces.
